# Supplementary material
Source: publisher figshare collection journal article supplement (https://gsapubs.figshare.com/ndownloader/files/22276929)
Supplement: Supplementary file 1 [file 22276929]

## Sheet: Calculated fO2 results
Input P and T		Calculated fO2			Major and trace element data of Olivine																		Major and trace element data of host melt													Intermediate variable
P (GPa)	T (oC)	△FMQ	error-△FMQ	logfO2	Spot Num.	Rim/Core	V(ppm)	Precision_V(±ppm)	SiO2	TiO2	Al2O3	FeOt	MnO	MgO	CaO	Na2O	K2O	Cr2O3	P2O5	NiO	V2O3	Total	Sample Num.	SiO2	TiO2	Al2O3	FeOt	MnO	MgO	CaO	Na2O	K2O	P2O5	V(ppm)	Mg#	DV ol/melt	Mg#ol
1.28301	1211.35	1.03296	±0.0968049725397185	-6.45803	SLP15-05-1-1_1	Rim	4.76352	0.0742208	41.061	0.049	0.221	24.304	0.113	33.708	0.466	0.047	0.046	0.053	0.071	0.067	-	100.397	SLP15	56.2	1.364	12.25	5.90269	0.106	7.57	5.2	1.77	5.8	0.9	149	0.697685	0.03197	0.71201
1.28301	1211.35	0.816354	±0.0764467838204048	-6.67464	SLP15-05-1-1_2	Rim	3.95519	0.10185	41.061	0.049	0.221	24.304	0.113	33.708	0.466	0.047	0.046	0.053	0.071	0.088	0.057	100.284	SLP15	56.2	1.364	12.25	5.90269	0.106	7.57	5.2	1.77	5.8	0.9	149	0.697685	0.0364674	0.71201
1.28301	1211.35	1.33899	±0.151968354092278	-6.152	SLP15-05-1-1_3	Rim	5.43364	0.105784	41.061	0.049	0.221	24.304	0.113	33.708	0.466	0.047	0.046	0.053	0.071	0.109	0.114	100.171	SLP15	56.2	1.364	12.25	5.90269	0.106	7.57	5.2	1.77	5.8	0.9	149	0.697685	0.0265449	0.71201
1.28301	1211.35	1.17114	±0.124744797867796	-6.31986	SLP15-05-1-1_4	Rim	4.3799	0.10564	41.061	0.049	0.221	24.304	0.113	33.708	0.466	0.047	0.046	0.053	0.071	0.13	0.171	100.058	SLP15	56.2	1.364	12.25	5.90269	0.106	7.57	5.2	1.77	5.8	0.9	149	0.697685	0.0293953	0.71201
1.28301	1211.35	0.771029	±0.0856897606446087	-6.71996	SLP15-05-1-2_1	Core	5.10897	0.15448	38.626	0.076	-	22.832	0.099	37.174	0.11	0.004	0.019	0.097	0.034	0.113	-	99.269	SLP15	56.2	1.364	12.25	5.90269	0.106	7.57	5.2	1.77	5.8	0.9	149	0.697685	0.0342884	0.743743
1.28301	1211.35	0.81509	±0.0842912597050114	-6.6759	SLP15-05-1-2_2	Core	4.974	0.122	38.626	0.076	-	22.832	0.099	37.174	0.11	0.004	0.019	0.097	0.034	0.113	-	99.269	SLP15	56.2	1.364	12.25	5.90269	0.106	7.57	5.2	1.77	5.8	0.9	149	0.697685	0.0333826	0.743743
1.28301	1211.35	0.889399	±0.0907604188742028	-6.6016	SLP15-05-1-2_3	Core	4.7544	0.1074	38.626	0.076	-	22.832	0.099	37.174	0.11	0.004	0.019	0.097	0.034	0.113	-	99.269	SLP15	56.2	1.364	12.25	5.90269	0.106	7.57	5.2	1.77	5.8	0.9	149	0.697685	0.0319087	0.743743
1.28301	1211.35	0.905126	±0.095759903667984	-6.58587	SLP15-02-6_1	Core	4.7835	0.1215	38.727	0.12	0.048	23.531	0.049	37.162	0.098	0.022	0.007	0.034	0.024	0.105	0.02	99.964	SLP15	56.2	1.364	12.25	5.90269	0.106	7.57	5.2	1.77	5.8	0.9	149	0.697685	0.032104	0.737891
1.28301	1211.35	0.995751	±0.100613435069375	-6.49524	SLP15-02-6_2	Core	4.5272	0.0941	38.727	0.12	0.048	23.531	0.049	37.162	0.098	0.022	0.007	0.034	0.024	0.105	0.02	99.964	SLP15	56.2	1.364	12.25	5.90269	0.106	7.57	5.2	1.77	5.8	0.9	149	0.697685	0.0303839	0.737891
1.28301	1211.35	0.800045	±0.0783231406499697	-6.69095	SLP15-02-6_3	Core	5.0989	0.1065	38.727	0.12	0.048	23.531	0.049	37.162	0.098	0.022	0.007	0.034	0.024	0.105	0.02	99.964	SLP15	56.2	1.364	12.25	5.90269	0.106	7.57	5.2	1.77	5.8	0.9	149	0.697685	0.0342208	0.737891
0.733623	1129.8	1.96856	±0.213234622303737	-6.82841	CZ20-13-1_1	Rim	3.0266	0.0512	41.102	0.01	0.008	14.149	0.117	44.515	0.112	-	-	0.023	0.106	0.036	-	100.178	CZ20	59.75	1.064	13.23	4.74195	0.077	4.44	5.83	2.42	7.05	0.63	146.21	0.602624	0.0207004	0.71201
0.733623	1129.8	1.48019	±0.160171130188465	-7.31679	CZ20-13-1_2	Rim	3.0567	0.0521	40.716	-	0.023	16.245	0.124	43.138	0.136	0.036	0.009	0.143	0.114	0.095	0.005	100.784	CZ20	59.75	1.064	13.23	4.74195	0.077	4.44	5.83	2.42	7.05	0.63	146.21	0.602624	0.0209063	0.82559
0.733623	1129.8	1.61785	±0.1736534070204	-7.17912	CZ20-13-1_3	Rim	3.1399	0.0531	38.738	0.029	0.012	20.755	0.154	40.091	0.13	0.01	0.013	0	0.043	0.031	0.036	100.042	CZ20	59.75	1.064	13.23	4.74195	0.077	4.44	5.83	2.42	7.05	0.63	146.21	0.602624	0.0214753	0.774943
0.733623	1129.8	1.35868	±0.166326812600155	-7.43829	CZ20-13-1_4	Core	3.1585	0.0866	41.061	0.049	0.221	24.304	0.113	33.708	0.466	0.047	0.046	0.053	0.071	0.088	0.057	100.284	CZ20	59.75	1.064	13.23	4.74195	0.077	4.44	5.83	2.42	7.05	0.63	146.21	0.602624	0.0216025	0.848676
0.733623	1129.8	1.27216	±0.128662608365149	-7.52481	CZ20-13-1_5	Core	3.4458	0.0461	40.936	-	0.017	15.938	0.169	43.37	0.118	-	-	0.037	0.054	0.037	0.047	100.723	CZ20	59.75	1.064	13.23	4.74195	0.077	4.44	5.83	2.42	7.05	0.63	146.21	0.602624	0.0235675	0.829081
0.399917	1057.6	2.64228	±0.248001042341709	-7.33204	MBL15-09-11-1_1	Rim	1.64096	0.06163	37.498	0.139	0.049	26.75	0.215	34.446	0.22	-	0.03	0.073	-	0.072	0.015	99.568	MBL15	61.33	1.074	13.27	4.85712	0.067	3.44	4.008	2.467	7.782	0.611	96.8446	0.560407	0.0169443	0.696551
0.399917	1057.6	2.51188	±0.230654871545095	-7.46245	MBL15-09-11-1_2	Rim	1.77628	0.0661962	37.498	0.139	0.049	26.75	0.215	34.446	0.22	-	0.03	0.073	-	0.072	0.015	99.568	MBL15	61.33	1.074	13.27	4.85712	0.067	3.44	4.008	2.467	7.782	0.611	96.8446	0.560407	0.0183415	0.696551
0.399917	1057.6	3.04447	±0.384186227722875	-6.92985	MBL15-09-11-1_3	Rim	1.28517	0.08072	37.498	0.139	0.049	26.75	0.215	34.446	0.22	-	0.03	0.073	-	0.072	0.015	99.568	MBL15	61.33	1.074	13.27	4.85712	0.067	3.44	4.008	2.467	7.782	0.611	96.8446	0.560407	0.0132704	0.696551
0.399917	1057.6	2.39935	±0.195534159531952	-7.57498	MBL15-09-11-1_4	Rim	1.90199	0.047489	37.498	0.139	0.049	26.75	0.215	34.446	0.22	-	0.03	0.073	-	0.072	0.015	99.568	MBL15	61.33	1.074	13.27	4.85712	0.067	3.44	4.008	2.467	7.782	0.611	96.8446	0.560407	0.0196396	0.696551
0.399917	1057.6	2.14559	±0.191809203317614	-7.82873	MBL15-09-11-2_1	Core	2.03251	0.07728	38.762	0.043	0.077	24.455	0.176	35.775	0.122	-	0.032	0.024	0.01	0.137	0.023	99.655	MBL15	61.33	1.074	13.27	4.85712	0.067	3.44	4.008	2.467	7.782	0.611	96.8446	0.560407	0.0209873	0.722818
0.399917	1057.6	1.93534	±0.224231500785318	-8.03899	MBL15-09-11-2_2	Core	2.30951	0.15966	38.762	0.043	0.077	24.455	0.176	35.775	0.122	-	0.032	0.024	0.01	0.137	0.023	99.655	MBL15	61.33	1.074	13.27	4.85712	0.067	3.44	4.008	2.467	7.782	0.611	96.8446	0.560407	0.0238476	0.722818
